# Supplementary material for: Mechanism of Pydiflumetofen Resistance in Fusarium graminearum in China
Source: MDPI journal article supplement (doi:10.3390/jof9010062), 2022-12-30
Supplement: s1 [file s1]

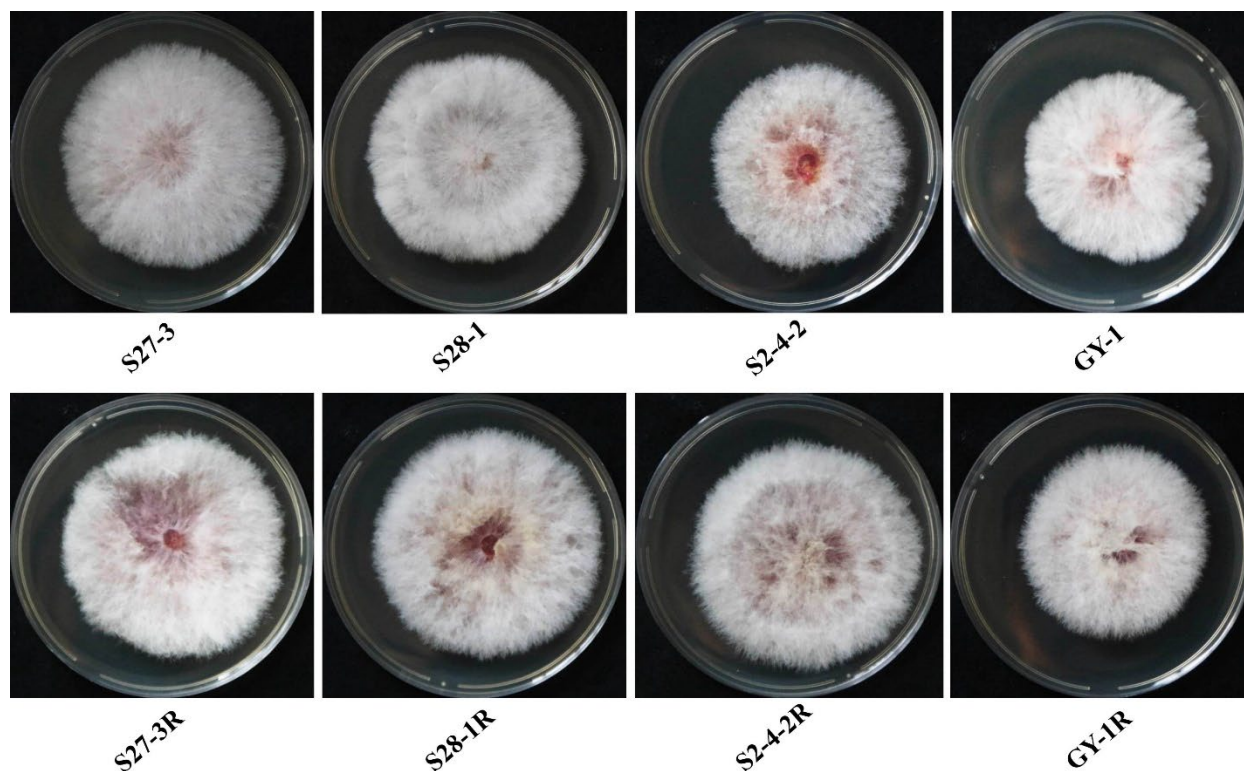

**Figure S1.** Mycelial growth of three pydiflumetofen-resistant mutants of *F. graminearum* and their sensitive parental isolates.

|                      |                       |     |                 |     |                 |                                |     |     |     |
|----------------------|-----------------------|-----|-----------------|-----|-----------------|--------------------------------|-----|-----|-----|
| <b><i>FgSdhA</i></b> | 520                   | 530 | 540             | 550 | 820             | 830                            | 840 | 850 | 860 |
| S27-3.seq            | AGCTCTTCCCTACCCGATCTC | C   | CACTGTGCGCCGCTC |     | CAGTCAAAGGAGTAC | GGAAAGGGTGGTCAGGCCTACCGATGCTG  |     |     |     |
| S2-4-2.seq           | AGCTCTTCCCTACCCGATCTC | C   | CACTGTGCGCCGCTC |     | CAGTCAAAGGAGTAC | GGAAAGGGTGGTCAGGCCTACCGATGCTG  |     |     |     |
| GY-1R.seq            | AGCTCTTCCCTACCCGATCTC | G   | CACTGTGCGCCGCTC |     | CAGTCAAAGGAGTTT | GGAAAGGGTGGTCAGGCCTACCGATGCTG  |     |     |     |
| S27-3R.seq           | AGCTCTTCCCTACCCGATCTC | C   | CACTGTGCGCCGCTC |     | CAGTCAAAGGAGTTT | GGAAAGGGTGGTCAGGCCTACCGATGCTG  |     |     |     |
| S2-4-2R.seq          | AGCTCTTCCCTACCCGATCTC | C   | CACTGTGCGCCGCTC |     | CAGTCAAAGGAGTTT | GGAAAGGGTGGTCAGGCCTACCGATGCTG  |     |     |     |
| GY-1R.seq            | AGCTCTTCCCTACCCGATCTC | C   | CACTGTGCGCCGCTC |     | CAGTCAAAGGAGTAC | GGAAAGGGTGGTCAGGCCTACCGATGCTG  |     |     |     |
| Consensus            | agctcttccctacccgatctc | c   | cactgtgcgcgcctc |     | cagtcaaaggagt   | ggaaaggggtggtcaggcctaccgatgctg |     |     |     |

  

|                      |                                                  |    |                                       |     |     |     |     |     |
|----------------------|--------------------------------------------------|----|---------------------------------------|-----|-----|-----|-----|-----|
| <b><i>FgSdhB</i></b> | 80                                               | 90 | 100                                   | 110 | 120 | 130 | 140 | 150 |
| S27-3.seq            | TGTCCTTCACTCGCTCTATGGCCTCGGTCAGCGAACCTGCCAAGG    | G  | CCCCGAGTCCAAGTTGAAGTCCTTCCAGATCTACCGA |     |     |     |     |     |
| S2-4-2.seq           | TGTCCTTCACTCGCTCTATGGCCTCGGTCAGCGAACCTGCCAAGG    | G  | CCCCGAGTCCAAGTTGAAGTCCTTCCAGATCTACCGA |     |     |     |     |     |
| GY-1R.seq            | TGTCCTTCACTCGCTCTATGGCCTCGGTCAGCGAACCTGCCAAGG    | G  | CCCCGAGTCCAAGTTGAAGTCCTTCCAGATCTACCGA |     |     |     |     |     |
| S27-3R.seq           | TGTCCTTCACTCGCTCTATGGCCTCGGTCAGCGAACCTGCCAAGG    | G  | CCCCGAGTCCAAGTTGAAGTCCTTCCAGATCTACCGA |     |     |     |     |     |
| S2-4-2R.seq          | TGTCCTTCACTCGCTCTATGGCCTCGGTCAGCGAACCTGCCAAGG    | G  | CCCCGAGTCCAAGTTGAAGTCCTTCCAGATCTACCGA |     |     |     |     |     |
| GY-1R.seq            | TGTCCTTCACTCGCTCTATGGCCTCGGTCAGCGAACCTGCCAAGG    | G  | CCCCGAGTCCAAGTTGAAGTCCTTCCAGATCTACCGA |     |     |     |     |     |
| Consensus            | tgtcttcaactcgctctatggcctcgggtcagcgaaacctgccaaagg | g  | ccccgagtccaagttgaagtccttccagatctaccga |     |     |     |     |     |

  

|                      |        |               |             |                  |          |                    |              |     |
|----------------------|--------|---------------|-------------|------------------|----------|--------------------|--------------|-----|
| <b><i>FgSdhC</i></b> | 270    | 280           | 370         | 380              | 390      | 650                | 660          | 670 |
| S27-3.seq            | GGCCAC | CAGATCCTCGTTA | TATCACC     | GGCTGTACACTCTCCG | CACCCCTC | GGCTATTGGTCTGGTTG  | CTTTTCCTGTAA |     |
| S2-4-2.seq           | GGCCAC | CAGATCCTCGTTA | TATCACC     | GGCTGTACACTCTCCG | CACCCCTC | GGCTATTGGTCTGGTTG  | CTTTTCCTGTAA |     |
| GY-1R.seq            | GGCCAC | CAGATCCTCGTTA | TATCACC     | GGCTGTACACTCTCCG | CACCCCTC | GGCTATTGGTCTGGTTG  | CTTTTCCTGTAA |     |
| S27-3R.seq           | GGCCAC | CAGATCCTCGTTA | TATCACC     | GGCTGTACACTCTCCG | CACCCCTC | GGCTATTGGTCTGGTTG  | CTTTTCCTGTAA |     |
| S2-4-2R.seq          | GGCCAC | CAGATCCTCGTTA | TATCACC     | GGCTGTACACTCTCCG | CACCCCTC | GGCTATTGGTCTGGTTG  | CTTTTCCTGTAA |     |
| GY-1R.seq            | GGCCAC | CAGATCCTCGTTA | TATCACC     | GGCTGTACACTCTCCG | CACCCCTC | GGCTATTGGTCTGGTTG  | CTTTTCCTGTAA |     |
| Consensus            | ggcca  | cagatcctcgtta | tatcacccggt | tacactctccg      | caccctc  | ggctattgggtctgggtt | tttcctgtaa   |     |

**Figure S2.** Multiple sequence of the *FgSdhA*, *FgSdhB*, and *FgSdhC* genes in pydiflumetofen-resistant mutants of *F. graminearum* and their sensitive parental isolates.

**Table S1.** Fungicides used in the current study.

| Fungicides           |                                          |                                                                                     |                        | Source                                        |
|----------------------|------------------------------------------|-------------------------------------------------------------------------------------|------------------------|-----------------------------------------------|
| Common names         | Fungicide groups                         | Mode of action target                                                               | FRAC <sup>N</sup> code |                                               |
| 98.0% Pydiflumetofen | Respiration                              | SDHI (Succinate dehydrogenase inhibitors)                                           | 7                      | Syngenta Investment Co., Ltd., China          |
| 96.2% Tebuconazole   | DMI (14 $\alpha$ -demethylase inhibitor) | Sterol biosynthesis in membranes                                                    | 3                      | Sheyang Huanghai Pesticide Chemical Co. Ltd.  |
| 96.0% Fludioxonil    | Phenylpyrrole                            | MAP/Histidine-Kinase in osmotic signal transduction                                 | 12                     | Hubei Jianyuan Chemical Co. Ltd.              |
| 95% Fluazinam        | Respiration                              | Uncouplers of oxidative phosphorylation                                             | 29                     | Zhejiang Heben Pesticide & Chemicals Co. Ltd. |
| 97.5% Pyraclostrobin | Respiration                              | Complex III: cytochrome bc <sub>1</sub> (ubiquinol oxidase) at Qo site (cyp b gene) | 11                     | Kangbaotai Fine-Chemical Co. Ltd.             |
| 95.0% difenoconazole | Sterol biosynthesis in membranes         | DMI-fungicides (Demethylation inhibitions) (SBI: Class I) Azole                     | 3                      | Hubei Jianyuan Chemical Co. Ltd.              |
| 98.1% Carbendazim    | Methyl benzimidazole carbamate           | $\beta$ -tubulin assembly in mitochondria                                           | 1                      | Haili Guixi Chemical Co. Ltd.                 |

<sup>N</sup>FRAC, Fungicide Resistance Action Committee.**Table S2.** Primers used in the current study.

| Primers     | Sequences (5' to 3')       | Application                |
|-------------|----------------------------|----------------------------|
| FgSdhA F    | AACCATATCCAACAAAAGTCCTACTC | Target genes amplification |
| FgSdhA R    | AACTCTTACTACAAAGGAGACGCTG  |                            |
| FgSdhB F    | CTAACGGAGGGGATTGTACGGCATT  |                            |
| FgSdhB R    | TAACCCTTCAGATCGCTTATGCCTCC |                            |
| FgSdhC F    | TACCAGCCCTCTTTGGAGTAACGACG |                            |
| FgSdhC R    | CTCGTCCAGACTCCTTTCCCTATATC |                            |
| FgSdhD F    | AACTCTAACTACTCCAAAAAGCCCT  |                            |
| FgSdhD R    | ATACAGATGCCCCGAGTCATAAACCT |                            |
| RT-actin-F  | GTCCACCTTCCAGCAAATGT       | Target genes expression    |
| RT-actin-R  | CCCAAAGCTTAGCGTCTGTC       |                            |
| RT-FgSdhA-F | AGGCTCCCGCTTCCATTAT        |                            |
| RT-FgSdhA-R | TTCCGTA CTCTTTGACTGACC     |                            |
| RT-FgSdhB-F | GCCCATCTTACTGGTGGAACT      |                            |
| RT-FgSdhB-R | GTGGCAACGGTACAGACTCATT     |                            |
| RT-FgSdhC-F | GCTCTGGCTGCTGGAATCTC       |                            |
| RT-FgSdhC-R | GCTACCGAACCATGTCTGCTC      |                            |
| RT-FgSdhD-F | TTGACCGTCGCTCCCTTTG        |                            |
| RT-FgSdhD-R | TCTCGAACTCGTACAGTCCCAC     |                            |
